# Supplementary material for: Municipal Wastewaters Carry Important Carbapenemase Genes Independent of Hospital Input and Can Mirror Clinical Resistance Patterns
Source: PubMed Central journal article supplement (PMC8941857; doi:10.1128/spectrum.02711-21), 2022-03-02
Supplement: spectrum02711-21_supp_1_seq11.pdf [file spectrum02711-21_supp_1_seq11.pdf]

## Supplementary material

### **Municipal wastewaters carry important carbapenemase genes independent of hospital input and can mirror clinical resistance patterns**

Teban-Man, A.<sup>1,2</sup>, Szekeres, E.<sup>2</sup>, Fang, P.<sup>3</sup>, Klümper, U.<sup>3</sup>, Hegedus, A.<sup>2</sup>, Baricz, A.<sup>2</sup>, Berendonk, T.U.<sup>3</sup>, Pârvu, M.<sup>1</sup>, Coman, C.<sup>2\*</sup>

<sup>1</sup> Department of Taxonomy and Ecology, Faculty of Biology and Geology, Babeş-Bolyai University, Cluj-Napoca, Romania

<sup>2</sup> Department of Taxonomy and Ecology, Institute of Biological Research, branch of NIRDBS, Cluj-Napoca, Romania

<sup>3</sup> Technische Universität Dresden, Institute of Hydrobiology, Dresden, Germany

\*Corresponding author: cristian.coman@icbcluj.ro

## Seasonal absolute abundances of 16S rRNA and carbapenemase genes in the investigated wastewaters

|        | <b>H-I 16S rRNA</b>     | <b>H-E 16S rRNA</b>     | <b>N-I 16S rRNA</b>     | <b>N-E 16S rRNA</b>     |
|--------|-------------------------|-------------------------|-------------------------|-------------------------|
| Winter | 1.95E+07<br>(±9.31E+06) | 7.44E+05<br>(±2.59E+05) | 1.21E+07<br>(±1.78E+07) | 1.31E+07<br>(±4.72E+06) |
| Spring | 3.50E+07<br>(±3.07E+06) | 1.06E+06<br>(±3.18E+05) | 4.90E+07<br>(±1.29E+07) | 1.53E+07<br>(±5.47E+06) |
| Summer | 9.26E+07<br>(±2.57E+07) | 1.62E+06<br>(±7.12E+05) | 9.64E+07<br>(±4.17E+07) | 2.12E+07<br>(±1.38E+07) |
| Autumn | 4.48E+07<br>(±5.67E+07) | 6.46E+05<br>(±4.85E+05) | 4.01E+07<br>(±5.31E+07) | 2.06E+07<br>(±2.06E+07) |
|        | <b>H-I blaKPC</b>       | <b>H-E blaKPC</b>       | <b>N-I blaKPC</b>       | <b>N-E blaKPC</b>       |
| Winter | 1.14E+04<br>(±8.71E+03) | 1.50E+02<br>(±1.10E+02) | 3.16E+01<br>(±2.28E+01) | 5.49E+01<br>(±8.87E+01) |
| Spring | 1.25E+03<br>(±4.03E+02) | 2.36E+00<br>(±NA)       | 2.25E+00<br>(±NA)       | 1.76E+01<br>(±2.25E+00) |
| Summer | 1.29E+04<br>(±9.93E+03) | 5.09E+01<br>(±1.77E+01) | 9.08E+02<br>(±3.26E+02) | 3.57E+03<br>(±5.61E+03) |
| Autumn | 1.02E+04<br>(±5.14E+03) | 4.49E+01<br>(±1.09E+01) | 2.28E+03<br>(±2.91E+03) | 4.82E+02<br>(±2.55E+02) |
|        | <b>H-I blaNDM</b>       | <b>H-E blaNDM</b>       | <b>N-I blaNDM</b>       | <b>N-E blaNDM</b>       |
| Winter | 8.12E+02<br>(±4.33E+02) | 1.19E+01<br>(±7.50E+00) | 3.19E+01<br>(±5.43E+00) | 8.16E+01<br>(±3.17E+01) |
| Spring | 2.58E+02<br>(±6.45E-01) | 4.80E+00<br>(±2.55E+00) | 4.50E+01<br>(±2.96E+01) | 6.35E+01<br>(±4.54E+01) |
| Summer | 1.09E+03<br>(±8.51E+02) | 2.67E+01<br>(±1.58E+01) | 2.76E+02<br>(±2.34E+02) | 2.54E+02<br>(±2.46E+02) |
| Autumn | 5.95E+02<br>(±3.86E+02) | 1.16E+01<br>(±1.44E+01) | 1.19E+02<br>(±1.85E+02) | 1.26E+02<br>(±1.76E+02) |
|        | <b>H-I blaOXA-48</b>    | <b>H-E blaOXA-48</b>    | <b>N-I blaOXA-48</b>    | <b>N-E blaOXA-48</b>    |
| Winter | 2.31E+03<br>(±1.52E+03) | 2.63E+01<br>(±1.69E+01) | 6.17E+02<br>(±2.24E+02) | 1.01E+02<br>(±9.19E+01) |
| Spring | 4.21E+02<br>(±7.10E+01) | 6.14E+00<br>(±5.97E-01) | 5.93E+02<br>(±4.69E+02) | 3.84E+01<br>(±1.06E+01) |
| Summer | 1.30E+03<br>(±3.05E+02) | 4.12E+01<br>(±2.51E+01) | 6.14E+02<br>(±2.05E+02) | 3.01E+02<br>(±1.92E+02) |
| Autumn | 1.16E+03<br>(±6.24E+02) | 2.28E+01<br>(±1.51E+01) | 3.41E+02<br>(±2.25E+02) | 3.72E+02<br>(±1.18E+02) |
|        | <b>H-I blaVIM</b>       | <b>H-E blaVIM</b>       | <b>N-I blaVIM</b>       | <b>N-E blaVIM</b>       |
| Winter | 4.61E+02<br>(±2.24E+02) | 3.55E+01<br>(±4.29E+01) | 2.90E+01<br>(±5.65E+00) | 7.04E+01<br>(±4.98E+01) |
| Spring | 1.49E+03<br>(±1.27E+03) | 2.58E+01<br>(±1.86E+01) | 1.86E+02<br>(±2.19E+02) | 5.25E+01<br>(±2.80E+01) |
| Summer | 2.00E+03<br>(±1.10E+03) | 3.97E+01<br>(±3.07E+01) | 1.87E+02<br>(±4.07E+01) | 1.70E+02<br>(±9.55E+01) |
| Autumn | 9.05E+02<br>(±9.91E+02) | 1.19E+01<br>(±1.40E+01) | 7.16E+01<br>(±1.11E+02) | 7.85E+01<br>(±8.97E+01) |
|        | <b>H-I blaIMP</b>       | <b>H-E blaIMP</b>       | <b>N-I blaIMP</b>       | <b>N-E blaIMP</b>       |
| Winter | 2.06E+03<br>(±2.52E+03) | 3.36E+03<br>(±1.85E+03) | 2.16E+02<br>(±3.59E+02) | 6.13E+03<br>(±9.59E+03) |
| Spring | 1.93E+03<br>(±1.60E+03) | 1.60E+03<br>(±1.13E+03) | 4.12E+02<br>(±4.22E+02) | 1.32E+04<br>(±1.10E+04) |
| Summer | 9.31E+02<br>(±8.70E+02) | 1.39E+03<br>(±1.80E+03) | 2.15E+02<br>(±2.86E+02) | 1.47E+04<br>(±1.74E+04) |
| Autumn | 2.83E+02<br>(±1.09E+02) | 6.52E+02<br>(±5.04E+02) | 4.61E+01<br>(±4.86E+01) | 2.16E+02<br>(±2.38E+02) |

Supplementary Table 2

## Average seasonal relative abundances (target CRG copies/16S rRNA gene copies) of CRGs in the investigated wastewaters

| H WWTP |                              |                              |                              |                              |                              |                              |                              |                              |                              |                              |
|--------|------------------------------|------------------------------|------------------------------|------------------------------|------------------------------|------------------------------|------------------------------|------------------------------|------------------------------|------------------------------|
| Season | <i>bla<sub>KPC</sub></i>     |                              | <i>bla<sub>NDM</sub></i>     |                              | <i>bla<sub>OXA-48</sub></i>  |                              | <i>bla<sub>VIM</sub></i>     |                              | <i>bla<sub>IMP</sub></i>     |                              |
|        | I                            | E                            | I                            | E                            | I                            | E                            | I                            | E                            | I                            | E                            |
| Spring | $2.95 \cdot 10^{-5}$         | $3.36 \cdot 10^{-6}$         | $6.54 \cdot 10^{-6}$         | $4.56 \cdot 10^{-6}$         | $1.12 \cdot 10^{-5}$         | $7.63 \cdot 10^{-6}$         | $3.64 \cdot 10^{-5}$         | $2.29 \cdot 10^{-5}$         | $5.49 \cdot 10^{-5}$         | $1.97 \cdot 10^{-3}$         |
|        | ( $\pm 8.30 \cdot 10^{-6}$ ) | ( $\pm$ NA)                  | ( $\pm 3.82 \cdot 10^{-9}$ ) | ( $\pm 1.38 \cdot 10^{-6}$ ) | ( $\pm 2.06 \cdot 10^{-6}$ ) | ( $\pm 2.09 \cdot 10^{-6}$ ) | ( $\pm 3.09 \cdot 10^{-5}$ ) | ( $\pm 2.12 \cdot 10^{-5}$ ) | ( $\pm 4.35 \cdot 10^{-5}$ ) | ( $\pm 1.50 \cdot 10^{-3}$ ) |
| Summer | $1.22 \cdot 10^{-4}$         | $3.71 \cdot 10^{-5}$         | $1.02 \cdot 10^{-5}$         | $2.60 \cdot 10^{-5}$         | $1.28 \cdot 10^{-5}$         | $4.27 \cdot 10^{-5}$         | $1.74 \cdot 10^{-5}$         | $3.31 \cdot 10^{-5}$         | $9.77 \cdot 10^{-6}$         | $6.67 \cdot 10^{-4}$         |
|        | ( $\pm 1.03 \cdot 10^{-4}$ ) | ( $\pm 1.20 \cdot 10^{-5}$ ) | ( $\pm 5.91 \cdot 10^{-6}$ ) | ( $\pm 2.38 \cdot 10^{-5}$ ) | ( $\pm 2.58 \cdot 10^{-6}$ ) | ( $\pm 4.36 \cdot 10^{-5}$ ) | ( $\pm 8.09 \cdot 10^{-6}$ ) | ( $\pm 2.20 \cdot 10^{-5}$ ) | ( $\pm 1.01 \cdot 10^{-5}$ ) | ( $\pm 6.59 \cdot 10^{-4}$ ) |
| Autumn | $3.92 \cdot 10^{-4}$         | $8.74 \cdot 10^{-5}$         | $2.03 \cdot 10^{-5}$         | $1.47 \cdot 10^{-5}$         | $5.36 \cdot 10^{-5}$         | $4.74 \cdot 10^{-5}$         | $1.90 \cdot 10^{-5}$         | $1.12 \cdot 10^{-5}$         | $1.61 \cdot 10^{-5}$         | $2.07 \cdot 10^{-3}$         |
|        | ( $\pm 3.08 \cdot 10^{-4}$ ) | ( $\pm 5.81 \cdot 10^{-5}$ ) | ( $\pm 1.06 \cdot 10^{-5}$ ) | ( $\pm 9.92 \cdot 10^{-6}$ ) | ( $\pm 4.89 \cdot 10^{-5}$ ) | ( $\pm 2.67 \cdot 10^{-5}$ ) | ( $\pm 4.87 \cdot 10^{-6}$ ) | ( $\pm 7.80 \cdot 10^{-6}$ ) | ( $\pm 1.42 \cdot 10^{-5}$ ) | ( $\pm 2.68 \cdot 10^{-3}$ ) |
| Winter | $7.69 \cdot 10^{-4}$         | $1.69 \cdot 10^{-4}$         | $4.76 \cdot 10^{-5}$         | $2.04 \cdot 10^{-5}$         | $1.52 \cdot 10^{-4}$         | $1.10 \cdot 10^{-4}$         | $2.37 \cdot 10^{-5}$         | $2.38 \cdot 10^{-4}$         | $1.30 \cdot 10^{-4}$         | $3.57 \cdot 10^{-3}$         |
|        | ( $\pm 6.55 \cdot 10^{-4}$ ) | ( $\pm 1.34 \cdot 10^{-4}$ ) | ( $\pm 3.36 \cdot 10^{-5}$ ) | ( $\pm 2.11 \cdot 10^{-5}$ ) | ( $\pm 1.25 \cdot 10^{-4}$ ) | ( $\pm 1.46 \cdot 10^{-4}$ ) | ( $\pm 1.30 \cdot 10^{-5}$ ) | ( $\pm 3.91 \cdot 10^{-4}$ ) | ( $\pm 1.68 \cdot 10^{-4}$ ) | ( $\pm 1.39 \cdot 10^{-3}$ ) |
| N WWTP |                              |                              |                              |                              |                              |                              |                              |                              |                              |                              |
| Season | <i>bla<sub>KPC</sub></i>     |                              | <i>bla<sub>NDM</sub></i>     |                              | <i>bla<sub>OXA-48</sub></i>  |                              | <i>bla<sub>VIM</sub></i>     |                              | <i>bla<sub>IMP</sub></i>     |                              |
|        | I                            | E                            | I                            | E                            | I                            | E                            | I                            | E                            | I                            | E                            |
| Spring | $3.88 \cdot 10^{-8}$         | $1.25 \cdot 10^{-6}$         | $8.68 \cdot 10^{-7}$         | $3.86 \cdot 10^{-6}$         | $1.12 \cdot 10^{-5}$         | $2.54 \cdot 10^{-6}$         | $3.32 \cdot 10^{-6}$         | $3.30 \cdot 10^{-6}$         | $7.52 \cdot 10^{-6}$         | $7.82 \cdot 10^{-4}$         |
|        | ( $\pm$ NA)                  | ( $\pm 5.93 \cdot 10^{-7}$ ) | ( $\pm 3.75 \cdot 10^{-7}$ ) | ( $\pm 1.58 \cdot 10^{-6}$ ) | ( $\pm 6.62 \cdot 10^{-6}$ ) | ( $\pm 2.12 \cdot 10^{-7}$ ) | ( $\pm 3.60 \cdot 10^{-6}$ ) | ( $\pm 6.47 \cdot 10^{-7}$ ) | ( $\pm 6.63 \cdot 10^{-6}$ ) | ( $\pm 4.41 \cdot 10^{-4}$ ) |
| Summer | $1.25 \cdot 10^{-5}$         | $1.14 \cdot 10^{-4}$         | $3.80 \cdot 10^{-6}$         | $1.75 \cdot 10^{-5}$         | $6.52 \cdot 10^{-6}$         | $2.70 \cdot 10^{-5}$         | $2.25 \cdot 10^{-6}$         | $1.23 \cdot 10^{-5}$         | $1.72 \cdot 10^{-6}$         | $6.74 \cdot 10^{-4}$         |
|        | ( $\pm 4.38 \cdot 10^{-6}$ ) | ( $\pm 1.52 \cdot 10^{-4}$ ) | ( $\pm 3.26 \cdot 10^{-6}$ ) | ( $\pm 1.42 \cdot 10^{-5}$ ) | ( $\pm 5.52 \cdot 10^{-7}$ ) | ( $\pm 3.01 \cdot 10^{-5}$ ) | ( $\pm 1.10 \cdot 10^{-6}$ ) | ( $\pm 9.86 \cdot 10^{-6}$ ) | ( $\pm 1.78 \cdot 10^{-6}$ ) | ( $\pm 4.63 \cdot 10^{-4}$ ) |
| Autumn | $6.31 \cdot 10^{-5}$         | $3.22 \cdot 10^{-5}$         | $2.01 \cdot 10^{-6}$         | $4.36 \cdot 10^{-6}$         | $1.69 \cdot 10^{-5}$         | $2.81 \cdot 10^{-5}$         | $1.19 \cdot 10^{-6}$         | $2.27 \cdot 10^{-6}$         | $1.65 \cdot 10^{-6}$         | $1.04 \cdot 10^{-5}$         |
|        | ( $\pm 2.99 \cdot 10^{-5}$ ) | ( $\pm 1.80 \cdot 10^{-5}$ ) | ( $\pm 1.16 \cdot 10^{-6}$ ) | ( $\pm 2.67 \cdot 10^{-6}$ ) | ( $\pm 1.08 \cdot 10^{-5}$ ) | ( $\pm 1.60 \cdot 10^{-5}$ ) | ( $\pm 7.62 \cdot 10^{-7}$ ) | ( $\pm 1.32 \cdot 10^{-6}$ ) | ( $\pm 8.93 \cdot 10^{-7}$ ) | ( $\pm 4.40 \cdot 10^{-6}$ ) |
| Winter | $1.09 \cdot 10^{-5}$         | $6.65 \cdot 10^{-6}$         | $3.07 \cdot 10^{-5}$         | $7.37 \cdot 10^{-6}$         | $4.09 \cdot 10^{-4}$         | $1.05 \cdot 10^{-5}$         | $2.26 \cdot 10^{-5}$         | $6.96 \cdot 10^{-6}$         | $1.09 \cdot 10^{-5}$         | $3.67 \cdot 10^{-4}$         |
|        | ( $\pm 8.48 \cdot 10^{-6}$ ) | ( $\pm 1.11 \cdot 10^{-5}$ ) | ( $\pm 4.53 \cdot 10^{-5}$ ) | ( $\pm 4.78 \cdot 10^{-6}$ ) | ( $\pm 4.88 \cdot 10^{-4}$ ) | ( $\pm 1.29 \cdot 10^{-5}$ ) | ( $\pm 3.04 \cdot 10^{-5}$ ) | ( $\pm 7.46 \cdot 10^{-6}$ ) | ( $\pm 7.62 \cdot 10^{-6}$ ) | ( $\pm 5.36 \cdot 10^{-4}$ ) |

Seasonal average values of wastewaters' physico-chemical parameters

| Data                                   | pH   | COD-Mn<br>mg/l | COD-Cr<br>mg/l | CBO5<br>mg/l | TSS<br>mg/l | Diss. solids<br>mg/l | NH <sub>4</sub> <sup>+</sup><br>mg/l | NO <sub>3</sub> <sup>-</sup><br>mg/l | NO <sub>2</sub> <sup>-</sup><br>mg/l | TN<br>mg/l | TP<br>mg/l | SO <sub>4</sub> <sup>2-</sup><br>mg/l | Cl <sup>-</sup><br>mg/l | HEM<br>mg/l | Deterg<br>mg/l | Cd<br>mg/l | Cr<br>mg/l | Cu<br>mg/l | Fe<br>mg/l | Ni<br>mg/l | Pb<br>mg/l | Zn<br>mg/l | Flow<br>l/s |
|----------------------------------------|------|----------------|----------------|--------------|-------------|----------------------|--------------------------------------|--------------------------------------|--------------------------------------|------------|------------|---------------------------------------|-------------------------|-------------|----------------|------------|------------|------------|------------|------------|------------|------------|-------------|
| Hospital input (H type wastewater)     |      |                |                |              |             |                      |                                      |                                      |                                      |            |            |                                       |                         |             |                |            |            |            |            |            |            |            |             |
| Spring                                 | 7.51 | 76.13          | 180.64         | 59.41        | 88.65       | 417.75               | 17.96                                | 9.25                                 | 0.27                                 | 22.30      | 3.32       | 67.30                                 | 96.53                   | 10.28       | 1.83           | 0.00024    | 0.00       | 0.02       | 1.01       | 0.01       | 0.01       | 0.09       | 629.46      |
| Summer                                 | 7.48 | 144.95         | 263.63         | 110.84       | 152.65      | 455.58               | 18.39                                | 12.74                                | 0.14                                 | 24.39      | 4.15       | 74.20                                 | 96.10                   | 15.60       | 2.48           | 0.00043    | 0.01       | 0.02       | 1.80       | 0.01       | 0.01       | 0.12       | 676.55      |
| Autumn                                 | 7.42 | 74.25          | 205.32         | 93.47        | 74.98       | 484.75               | 20.55                                | 12.71                                | 0.26                                 | 25.24      | 4.38       | 70.88                                 | 132.10                  | 15.68       | 1.94           | 0.00018    | 0.00       | 0.02       | 0.74       | 0.00       | 0.00       | 0.07       | 658.38      |
| Winter                                 | 7.42 | 145.54         | 435.91         | 128.02       | 230.51      | 502.83               | 25.48                                | 64.50                                | 0.33                                 | 35.91      | 7.45       | 88.99                                 | 148.62                  | 15.78       | 2.66           | 0.00048    | 0.00       | 0.04       | 1.81       | 0.01       | 0.01       | 0.15       | 645.68      |
| Non-hospital input (N type wastewater) |      |                |                |              |             |                      |                                      |                                      |                                      |            |            |                                       |                         |             |                |            |            |            |            |            |            |            |             |
| Spring                                 | 7.60 | 143.50         | 339.35         | 115.48       | 157.50      | 575.25               | 28.57                                | 5.87                                 | 2.72                                 | 35.07      | 5.63       | 120.44                                | 123.90                  | 26.18       | 3.58           | 0.00018    | 0.00       | 0.02       | 2.04       | 0.00       | 0.01       | 0.12       | 9.30        |
| Summer                                 | 7.69 | 134.00         | 334.32         | 136.37       | 144.33      | 627.00               | 38.51                                | 5.12                                 | 0.81                                 | 35.92      | 5.71       | 108.97                                | 107.55                  | 27.67       | 5.01           | 0.00015    | 0.00       | 0.02       | 1.49       | 0.01       | 0.00       | 0.10       | 8.34        |
| Autumn                                 | 7.72 | 136.55         | 443.01         | 209.44       | 180.67      | 640.00               | 61.38                                | 2.25                                 | 0.21                                 | 56.91      | 7.89       | 92.94                                 | 101.05                  | 41.47       | 7.01           | 0.00017    | 0.00       | 0.03       | 1.92       | 0.00       | 0.00       | 0.13       | 8.27        |
| Winter                                 | 7.59 | 177.38         | 572.53         | 224.73       | 232.17      | 581.83               | 62.91                                | 2.30                                 | 0.55                                 | 66.84      | 8.27       | 115.51                                | 144.83                  | 26.87       | 7.09           | 0.00020    | 0.00       | 0.04       | 1.93       | 0.01       | 0.01       | 0.19       | 8.88        |

I-Influent

E-effluent

TSS – Total suspended solids

HEM - n-Hexane-extractable material (oil and grease)

Supplementary Table 5

Spearman's correlation between wastewater parameters and absolute copy numbers of genes (16S rRNA and CRGs)

|                              | COD-Mn  | COD-Cr   | BOD <sub>5</sub> | TSS     | Diss. Solids | NH <sub>4</sub> <sup>+</sup> | NO <sub>3</sub> <sup>-</sup> | NO <sub>2</sub> <sup>-</sup> | TN      | TP       | SO <sub>4</sub> <sup>2-</sup> | Cl <sup>-</sup> | HEM      | Deterg   | Cd      | Cr      | Cu      | Fe      | Ni      | Pb      | Zn      | Flow   |
|------------------------------|---------|----------|------------------|---------|--------------|------------------------------|------------------------------|------------------------------|---------|----------|-------------------------------|-----------------|----------|----------|---------|---------|---------|---------|---------|---------|---------|--------|
| 16S rRNA                     | 0.587** | 0.582**  | 0.620**          | 0.615** |              | 0.526**                      | -0.524**                     | 0.352**                      | 0.504** | 0.513**  | 0.552**                       |                 | 0.681**  | 0.571**  | 0.490** | 0.551** | 0.544** | 0.630** | 0.557** | 0.554** | 0.477** |        |
| <i>bla</i> <sub>NDM</sub>    | 0.495** | 0.525**  | 0.578**          | 0.603** |              | 0.486**                      | -0.559**                     | 0.273*                       | 0.475** | 0.449**  | 0.395**                       |                 | 0.564**  | 0.455**  | 0.485** | 0.602** | 0.573** | 0.532** | 0.483** | 0.512** | 0.495** |        |
| <i>bla</i> <sub>KPC</sub>    | 0.336** | 0.372**  | 0.526**          | 0.423** |              | 0.373**                      | -0.417**                     |                              | 0.374** | 0.344**  |                               | -0.288*         | 0.522**  | 0.402**  | 0.279*  | 0.528** | 0.409** | 0.328** | 0.273*  | 0.298*  | 0.364** | 0.263* |
| <i>bla</i> <sub>OXA-48</sub> | 0.538** | 0.586**  | 0.688**          | 0.576** |              | 0.579**                      | -0.572**                     | 0.335**                      | 0.528** | 0.538**  | 0.488**                       |                 | 0.719**  | 0.597**  | 0.440** | 0.557** | 0.595** | 0.546** | 0.424** | 0.488** | 0.502** |        |
| <i>bla</i> <sub>VIM</sub>    | 0.344** | 0.356**  | 0.428**          | 0.427** |              | 0.249*                       | -0.379**                     | 0.315*                       |         |          | 0.291*                        |                 | 0.440**  | 0.316*   | 0.320*  | 0.508** | 0.367** | 0.429** | 0.446** | 0.357** | 0.395** |        |
| <i>bla</i> <sub>IMP</sub>    | -0.280* | -0.324** | -0.366**         |         | -0.346**     | -0.367**                     | 0.367**                      |                              | -0.263* | -0.334** | -0.280*                       |                 | -0.369** | -0.426** |         |         |         |         |         |         |         |        |

\*p &lt; 0.05, \*\*p &lt; 0.01.

**Supplementary Table 6**

R<sup>2</sup> values and P-values from permutational multivariate analysis of variance (PERMANOVA) based on OTUs table and ARGs absolute abundance

|                               | ARGs           |       | OTUs           |       |
|-------------------------------|----------------|-------|----------------|-------|
|                               | R <sup>2</sup> | P     | R <sup>2</sup> | P     |
| pH                            | 0.026*         | 0.037 | 0.053***       | 0.001 |
| COD-Mn                        | 0.133***       | 0.001 | 0.168***       | 0.001 |
| COD-Cr                        | 0.027*         | 0.022 | 0.025**        | 0.01  |
| BOD <sub>5</sub>              | 0.048***       | 0.001 | 0.071***       | 0.001 |
| TSS                           | 0.047***       | 0.001 | 0.034***       | 0.001 |
| Diss. Solids                  | 0.054***       | 0.001 | 0.024*         | 0.017 |
| NH <sub>4</sub> <sup>+</sup>  | 0.005          | 0.795 | 0.021*         | 0.035 |
| NO <sub>3</sub> <sup>-</sup>  | 0.007          | 0.694 | 0.013          | 0.153 |
| NO <sub>2</sub> <sup>-</sup>  | 0.018          | 0.1   | 0.013          | 0.179 |
| TN                            | 0.026*         | 0.019 | 0.046***       | 0.001 |
| TP                            | 0.007          | 0.65  | 0.020*         | 0.041 |
| SO <sub>4</sub> <sup>2-</sup> | 0.006          | 0.726 | 0.014          | 0.176 |
| Cl <sup>-</sup>               | 0.022*         | 0.021 | 0.008          | 0.529 |
| HEM                           | 0.014          | 0.239 | 0.013          | 0.167 |
| Deterg                        | 0.042**        | 0.002 | 0.017          | 0.076 |
| Cd                            | 0.011          | 0.348 | 0.012          | 0.2   |
| Cr                            | 0.008          | 0.622 | 0.004          | 0.97  |
| Cu                            | 0.010          | 0.416 | 0.010          | 0.288 |
| Fe                            | 0.015          | 0.213 | 0.009          | 0.437 |
| Ni                            | 0.016          | 0.168 | 0.014          | 0.145 |
| Pb                            | 0.009          | 0.549 | 0.010          | 0.399 |
| Zn                            | 0.009          | 0.6   | 0.012          | 0.201 |
| Flow                          | 0.030*         | 0.019 | 0.026*         | 0.016 |

\*P < 0.05, \*\*P < 0.01, \*\*\*P < 0.001

Supplementary Fig. 1

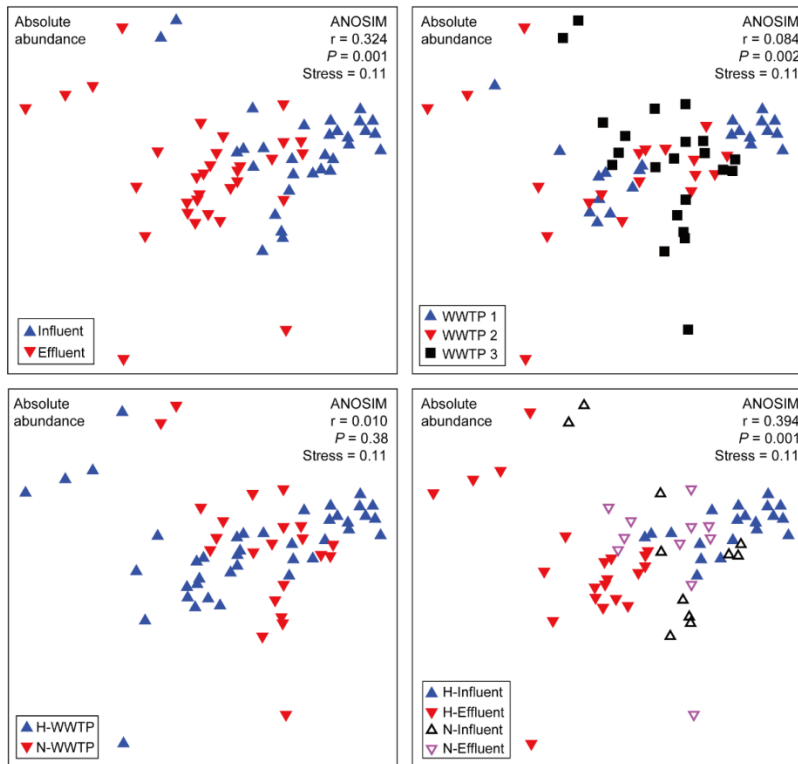

A. Non-metric multidimensional scaling (NMDS) ordination of genes based on Bray-Curtis similarity of absolute abundance. H-Influent: Hospital influent, H-Effluent: Hospital effluent, N-Influent: Non-hospital influent, N-Effluent: Non-hospital effluent.

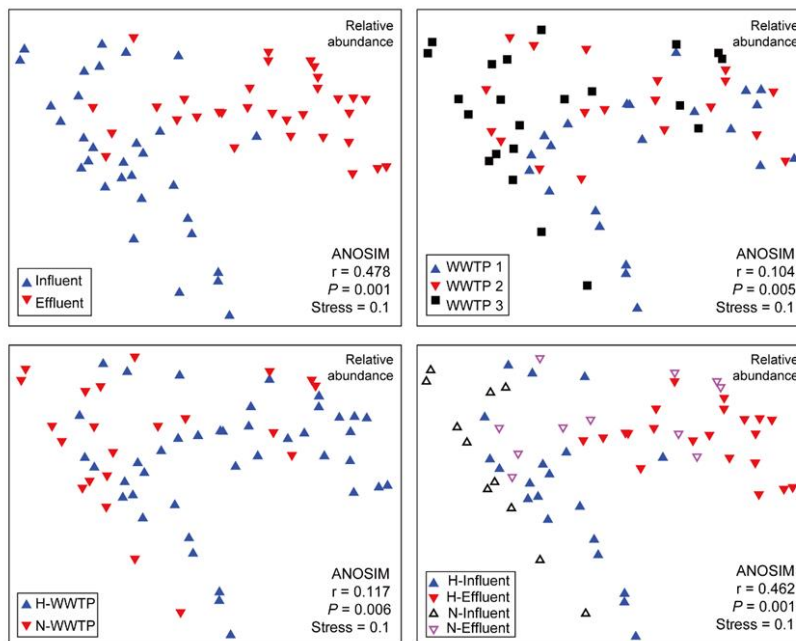

B. Non-metric multidimensional scaling (NMDS) ordination of genes based on Bray-Curtis similarity of relative abundance (target CRG copies/16S rRNA gene copies). H-Influent: Hospital influent, H-Effluent: Hospital effluent, N-Influent: Non-hospital influent, N-Effluent: Non-hospital effluent.

**Supplementary Fig. 2**

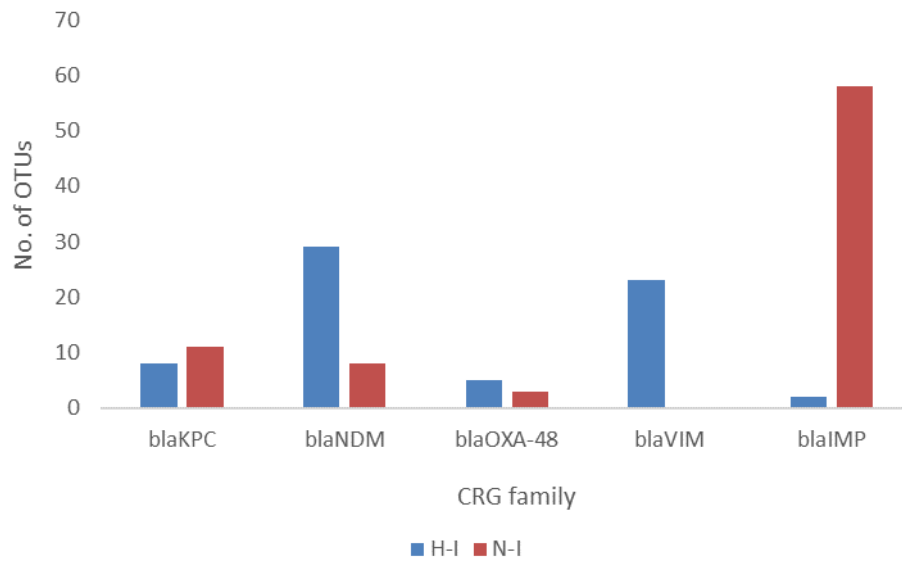

Number of OTUs presenting very strong correlations (Spearman's  $r > 0.8$ ;  $p < 0.01$ ) with the different CRG families in the influent samples of H and N wastewater types.
